# Supplementary material for: Influence of nitrogen oxides and volatile organic compounds emission changes on tropospheric ozone variability, trends and radiative effect
Source: Copernicus journal article supplement (doi:10.5194/egusphere-2024-3050), 2024-10-16
Supplement: Supplementary file 1 [file egusphere-2024-3050-supplement.pdf]

# **Influence of nitrogen oxides and volatile organic compounds emission changes on tropospheric ozone variability, trends and radiative effect**

Suvarna Fadnavis<sup>1</sup>, Yasin Elshorbany<sup>2</sup>, Jerald Ziemke<sup>3</sup>, Brice Barret<sup>4</sup>, Alexandru Rap<sup>5</sup>, Satheesh Chandran PR<sup>1</sup>, Richard J. Pope<sup>5</sup>, Vijay Sagar<sup>1</sup>, Domenico Taraborrelli<sup>6</sup>, Eric Le Flochmoe<sup>3</sup>, Juan Cuesta<sup>7</sup>, Catherine Wespes<sup>8</sup>, Folkert Boersma<sup>9,10</sup>, Isolde Glissenaar<sup>9</sup>, Isabelle De Smedt<sup>11</sup>, Michel Van Roozendael<sup>11</sup>, Hervé Petetin<sup>12</sup>, Isidora Anglou<sup>9</sup>

<sup>1</sup>Center for Climate Change Research, Indian Institute of Tropical Meteorology, MoES, Pune, India

<sup>2</sup>School of Geosciences, College of Arts and Sciences, University of South Florida, St. Petersburg, FL, USA

<sup>3</sup>NASA Goddard Space Flight Center, Greenbelt, Maryland, USA

<sup>4</sup>LAERO/OMP, Université Paul Sabatier, Université de Toulouse-CNRS, Toulouse, France

<sup>5</sup>School of Earth and Environment, University of Leeds, Leeds, UK; National Centre for Earth Observation, University of Leeds, Leeds, UK

<sup>6</sup>Institute of Climate and Energy Systems, ICE-3: Troposphere, Forschungszentrum Jülich GmbH, Jülich, Germany,

<sup>7</sup>University Paris Est Creteil and Université Paris Cité, CNRS, LISA, F-94010 Créteil, France

<sup>8</sup>Université libre de Bruxelles (ULB), Spectroscopy, Quantum Chemistry and Atmospheric Remote Sensing, Brussels, Belgium

<sup>9</sup>Royal Netherlands Meteorological Institute (KNMI), De Bilt, The Netherlands

<sup>10</sup>Wageningen University, Environmental Sciences Group, Wageningen, The Netherlands

<sup>11</sup>Belgian Institute for Space Aeronomy, Brussels, Belgium

<sup>12</sup>Barcelona Supercomputing Center, Barcelona, Spain

Corresponding author email: [suvarna@tropmet.res.in](mailto:suvarna@tropmet.res.in)

## **Contents of this file**

Table S1

Figure S1

Table S1. Primary volatile organic compounds. BIGALKANE is a lumped species for all alkanes C4 and greater, BIGENE lumps all alkenes C4 and greater.

| S.N. | VOCs name    |
|------|--------------|
| 1    | Benzene      |
| 2    | BIGALKANE    |
| 3    | BIGENE       |
| 4    | acetylene    |
| 5    | ethene       |
| 6    | ethanol      |
| 7    | ethane       |
| 8    | propene      |
| 9    | propane      |
| 10   | formaldehyde |
| 11   | acetaldehyde |
| 12   | acetone      |
| 13   | acetic acid  |
| 14   | methanol     |
| 15   | methane      |
| 16   | formic acid  |
| 17   | butan-2-one  |
| 18   | toluene      |
| 19   | xylenes      |

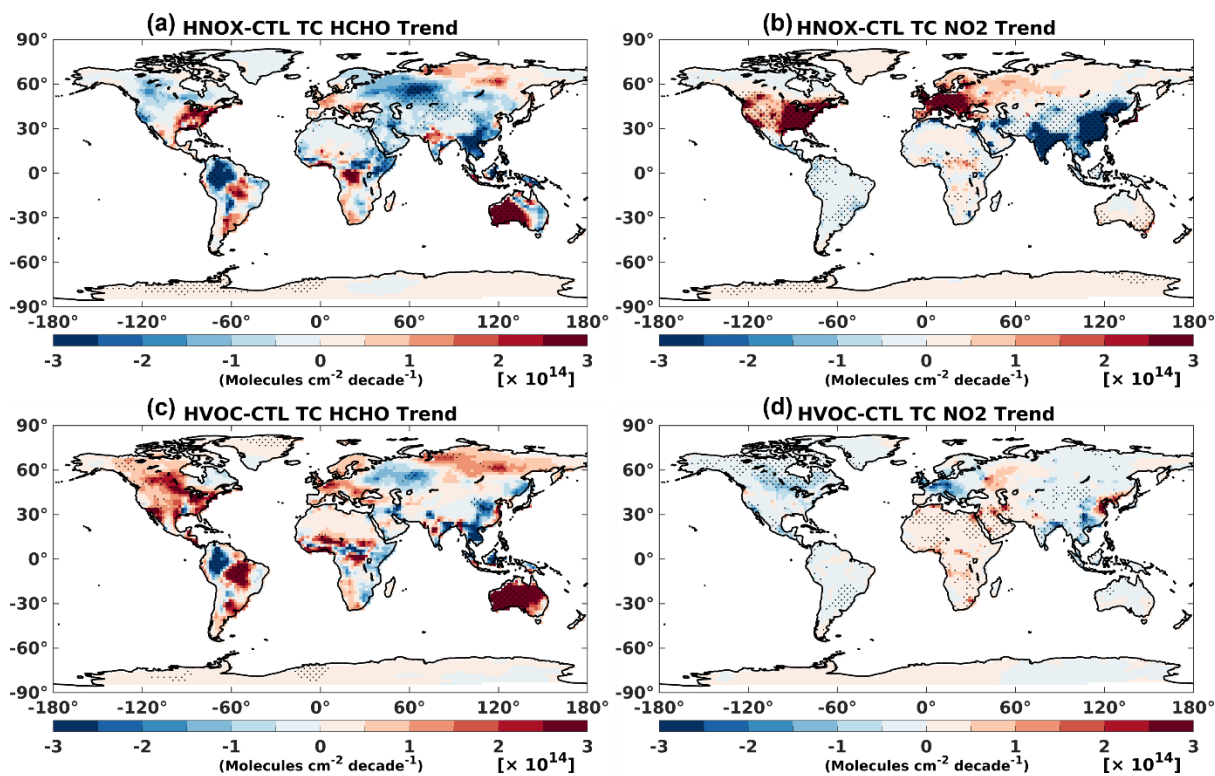

Figure S1. Trends in the tropospheric column (a) HCHO, (b) NO<sub>2</sub> during 1998 – 2019 from ECHAM6–HAMMOZ simulation for HNO<sub>x</sub> - CTL. (c–d) are the same as that of (a–b) but for HVOC - CTL simulation. The stippled region indicates the trend significant at 95% confidence based on the t-test.
